# Supplementary material for: Deciphering the Role of microRNA Mediated Regulation of Coronin 1C in Glioblastoma Development and Metastasis
Source: MDPI journal article supplement (doi:10.3390/ncrna9010004), 2023-01-04
Supplement: s1 [file s1]

Table 1S. Common miRNAs (62) in "miRSystem ", "TargetScan", "miRWalk" and "ENCORI".

|                  |
|------------------|
| hsa-miR-125a-5p  |
| hsa-miR-125b-5p  |
| hsa-miR-128-3p   |
| hsa-miR-129-2-3p |
| hsa-miR-129-5p   |
| hsa-miR-133b     |
| hsa-miR-135b-5p  |
| hsa-miR-136-5p   |
| hsa-miR-141-3p   |
| hsa-miR-149-5p   |
| hsa-miR-150-5p   |
| hsa-miR-181a-5p  |
| hsa-miR-181b-5p  |
| hsa-miR-181d-5p  |
| hsa-miR-182-5p   |
| hsa-miR-185-5p   |
| hsa-miR-194-5p   |
| hsa-miR-197-3p   |
| hsa-miR-200a-3p  |
| hsa-miR-200b-3p  |
| hsa-miR-200c-3p  |
| hsa-miR-204-5p   |
| hsa-miR-206      |
| hsa-miR-21-5p    |
| hsa-miR-211-5p   |
| hsa-miR-214-3p   |
| hsa-miR-221-3p   |
| hsa-miR-222-3p   |
| hsa-miR-26a-5p   |
| hsa-miR-28-5p    |
| hsa-miR-300      |
| hsa-miR-31-5p    |
| hsa-miR-326      |
| hsa-miR-330-5p   |
| hsa-miR-338-3p   |
| hsa-miR-34a-5p   |
| hsa-miR-34c-5p   |
| hsa-miR-381-3p   |
| hsa-miR-409-3p   |
| hsa-miR-433-3p   |
| hsa-miR-449a     |
| hsa-miR-449b-5p  |
| hsa-miR-494-3p   |

|                 |
|-----------------|
| hsa-miR-495-3p  |
| hsa-miR-508-3p  |
| hsa-miR-512-3p  |
| hsa-miR-519c-5p |
| hsa-miR-519e-5p |
| hsa-miR-520d-5p |
| hsa-miR-520f-3p |
| hsa-miR-524-5p  |
| hsa-miR-543     |
| hsa-miR-552-3p  |
| hsa-miR-579-3p  |
| hsa-miR-588     |
| hsa-miR-613     |
| hsa-miR-616-3p  |
| hsa-miR-708-5p  |
| hsa-miR-874-3p  |
| hsa-miR-9-5p    |
| hsa-miR-942-5p  |
| hsa-miR-96-5p   |
